# Supplementary material for: Combing stereotactic body radiotherapy with checkpoint inhibitors after oligoprogression in advanced non-small cell lung cancer
Source: PubMed Central journal article supplement — Transl Lung Cancer Res. 2021 Dec;10(12):4368–79. doi: 10.21037/tlcr-21-682 (PMC8743519; doi:10.21037/tlcr-21-682), 2021-12
Supplement: tlcr-10-12-4368-supplementary.pdf [file tlcr-10-12-4368-supplementary.pdf]

**Table S1** The Dosimetry Index of Oligoprogression Sites during Cyber Knife Radiosurgery Treatment

| Item   | CI        | nCI       | HI        | Coverage (%) | Prescription dose (Gy) | PTV (cm <sup>3</sup> ) | BED10 (Gy) | Isodose (%) |
|--------|-----------|-----------|-----------|--------------|------------------------|------------------------|------------|-------------|
| Range  | 1.05-7.10 | 1.12-7.39 | 1.10-1.54 | 71.34-99.82  | 30-50                  | 0.74-162.44            | 45-124.8   | 65-88       |
| Mean   | 1.83      | 2.06      | 1.29      | 89           | 37.68                  | 20.70                  | 72.93      | 78          |
| Median | 1.34      | 1.67      | 1.29      | 92           | 37.5                   | 10.34                  | 65.7       | 79          |

Coverage: the volume of tumor receiving greater than or equal to prescription does divided by total volume of tumor times 100; CI: conformity index; HI: homogeneity index; PTV: planning target volume; BED10: biologically effective dose assuming tumor alpha/beta = 10 Gy.

**Table S2** Details of each patient

| Patient ID. | Sex    | Age | ECOG | Smoking | Pathology      | Stage | PD-L1 TPS | LIPI | EGFR      | ALK       | KRAS      | TP53      | Lines of CPI therapy before SBRT | Regimens of ICI therapy before SBRT                                                                   | Oligoprogressive lesions | Regimens after SBRT                        | Response of each lesion |
|-------------|--------|-----|------|---------|----------------|-------|-----------|------|-----------|-----------|-----------|-----------|----------------------------------|-------------------------------------------------------------------------------------------------------|--------------------------|--------------------------------------------|-------------------------|
| 1           | Male   | 68  | 1    | Always  | Adenocarcinoma | IVb   | 35%       | 1    | Mutant    | Wild-type | Wild-type | Wild-type | 1                                | Pembrolizumab+Docetaxel(4 cycle), and then followed by Pembrolizumab                                  | Lung                     | Pembrolizumab                              | CR                      |
| 2           | Male   | 70  | 2    | Always  | Adenocarcinoma | IVb   | <1%       | 1    | Mutant    | Wild-type | Wild-type | Wild-type | 1                                | Atezolizumab + nab-paclitaxel (4 cycle)+ Bevacizumab, and then followed by Atezolizumab + Bevacizumab | Liver                    | Atezolizumab+ Bevacizumab                  | PR                      |
| 3           | Male   | 63  | 2    | Never   | Adenocarcinoma | IVb   | 50%       | 0    | Wild-type | Wild-type | Mutant    | Mutant    | 1                                | Pembrolizumab+Bevacizumab                                                                             | Brain, Brain             | Pembrolizumab+Bevacizumab                  | CR, CR                  |
| 4           | Male   | 82  | 1    | Former  | Squamous       | IVA   | 0         | 1    | Unkown    | Unkown    | Unkown    | Unkown    | 1                                | Pembrolizumab+nab-paclitaxel+carboplatin(4 cycle), and then followed by Pembrolizumab                 | Lung, Brain              | Pembrolizumab                              | PR, CR                  |
| 5           | Male   | 65  | 1    | Always  | Squamous       | IIIB  | 0         | 2    | Wild-type | Wild-type | Unkown    | Unkown    | 1                                | Sintilimab+DP(6 cycle), and then followed by Sintilimab                                               | Brain, Brain             | Sintilimab+Anlotinib (Ajusted)             | PR, PR                  |
| 6           | Male   | 67  | 0    | Former  | Adenocarcinoma | IVA   | 50%       | 0    | Wild-type | Wild-type | Mutant    | Wild-type | 1                                | Pembrolizumab+AP(4 cycle), and then followed by Pembrolizumab+ Pemetrexed                             | LN                       | Pembrolizumab + Pemetrexed                 | CR                      |
| 7           | Female | 52  | 1    | Never   | Squamous       | IVb   | 0         | 0    | Unkown    | Unkown    | Unkown    | Unkown    | 2                                | Toripalimab+TP(4 cycle), and then followed by Toripalimab                                             | Lung                     | Toripalimab+Anlotinib (Ajusted)            | PD                      |
| 8           | Male   | 48  | 2    | Always  | Adenocarcinoma | IVb   | 0         | 1    | Wild-type | Wild-type | Wild-type | Mutant    | 2                                | Nivolumab+Anlotinib                                                                                   | Lung                     | Nivolumab+Anlotinib                        | SD                      |
| 9           | Male   | 76  | 1    | Always  | Adenocarcinoma | IVb   | 40%       | 0    | Wild-type | Wild-type | Mutant    | Mutant    | 2                                | Pembrolizumab+ Bevacizumab                                                                            | Adrenal                  | Pembrolizumab+Bevacizumab                  | PR                      |
| 10          | Female | 63  | 2    | Never   | Squamous       | IVb   | <1%       | 0    | Wild-type | Wild-type | Mutant    | Mutant    | 3                                | Pembrolizumab+Gemcitabine(4 cycle)+Bevacizumab                                                        | Adrenal                  | Pembrolizumab+Bevacizumab                  | PD                      |
| 11          | Male   | 54  | 2    | Never   | Adenocarcinoma | IVb   | 0         | 0    | Wild-type | Wild-type | Unkown    | Unkown    | 1                                | Toripalimab+ AP(4 cycle), and then followed by Toripalimab                                            | Brain                    | Toripalimab                                | PD                      |
| 12          | Female | 48  | 1    | Never   | Squamous       | IVb   | 0         | 1    | Unkown    | Unkown    | Unkown    | Unkown    | 1                                | Tislelizumab+TC(6 cycle)                                                                              | Brain, Brain             | Tislelizumab                               | PR, PR                  |
| 13          | Male   | 55  | 2    | Never   | Adenocarcinoma | IVb   | 10%       | 0    | Mutant    | Wild-type | Wild-type | Wild-type | 1                                | Atezolizumab+Bevacizumab                                                                              | Brain, Brain             | Atezolizumab+Bevacizumab                   | PR, CR                  |
| 14          | Male   | 55  | 1    | Never   | Adenocarcinoma | IVb   | 45%       | 0    | Wild-type | Wild-type | Wild-type | Wild-type | 3                                | Nivolumab                                                                                             | Bone                     | Nivolumab+Bevacizumab (Ajusted)            | CR                      |
| 15          | Female | 37  | 1    | Never   | Adenocarcinoma | IVA   | 80%       | 0    | Wild-type | Wild-type | Wild-type | Wild-type | 2                                | Nivolumab                                                                                             | LN                       | Nivolumab                                  | CR                      |
| 16          | Female | 40  | 1    | Never   | Adenocarcinoma | IVA   | 35%       | 0    | Wild-type | Wild-type | Wild-type | Wild-type | 2                                | Nivolumab                                                                                             | Lung, LN                 | Nivolumab+Pemetrexed (Ajusted)             | SD, CR                  |
| 17          | Female | 51  | 2    | Never   | Squamous       | IVb   | 0         | 2    | Unkown    | Unkown    | Unkown    | Unkown    | 3                                | Nivolumab                                                                                             | Brain, Brain             | Nivolumab+Bevacizumab (Ajusted)            | PR, CR                  |
| 18          | Male   | 46  | 1    | Always  | Adenocarcinoma | IIIB  | Unknown   | 0    | Wild-type | Wild-type | Wild-type | Wild-type | 1                                | Pembrolizumab+AP(4 cycle)+ Bevacizumab, and then followed by Pembrolizumab+ Bevacizumab               | Lung                     | Pembrolizumab+Bevacizumab                  | PR                      |
| 19          | Male   | 69  | 1    | Always  | Adenocarcinoma | IVA   | 10%       | 1    | Wild-type | Wild-type | Wild-type | Unkown    | 1                                | Sintilimab+AP(4 cycle)+Anlotinib, and then followed by Sintilimab+Anlotinib                           | Lung                     | Sintilimab+Anlotinib                       | SD                      |
| 20          | Male   | 69  | 1    | Always  | Squamous       | IVb   | <1%       | 0    | Wild-type | Wild-type | Wild-type | Mutant    | 1                                | Tislelizumab+DP(4 cycle),and then followed by Tislelizumab                                            | LN, LN                   | Tislelizumab+nab-paclitaxel (Ajusted)      | PR, PR                  |
| 21          | Female | 52  | 1    | Never   | Adenocarcinoma | IVb   | >1%       | 0    | Wild-type | Wild-type | Wild-type | Wild-type | 1                                | Sintilimab+AP(6 cycle),and then followed by Sintilimab                                                | Brain, Brain             | Sintilimab+Gemcitabine+Anlotinib (Ajusted) | PR, PR                  |
| 22          | Male   | 71  | 1    | Always  | Squamous       | IIIB  | 2%        | 1    | Wild-type | Wild-type | Unkown    | Unkown    | 1                                | Sintilimab+DP(6 cycle),and then followed by Sintilimab                                                | Lung                     | Sintilimab                                 | PR                      |
| 23          | Male   | 78  | 1    | Always  | Adenocarcinoma | IVB   | 10%       | 0    | Wild-type | Wild-type | Wild-type | Unkown    | 1                                | Pembrolizumab+AC(6 cycle), and then followed by Pembrolizumab                                         | Lung, Adrenal            | Pembrolizumab                              | PR, PR                  |
| 24          | Male   | 71  | 2    | Always  | Squamous       | IIIB  | >1%       | 1    | Wild-type | Wild-type | Wild-type | Wild-type | 1                                | Nivolumab combined Anlotinib                                                                          | Lung                     | Nivolumab+Anlotinib                        | CR                      |

ECOG: performance score of Eastern Cooperative Oncology Group; TPS: tumor proportion score; LIPI, the lung immune prognostic index; CPI, checkpoint inhibitor; SBRT: stereotactic body radiotherapy; LN: lymph node; CR: complete response; PR: partial response; SD: stable disease; PD: progression disease; AC/AP: Pemetrexed-cisplatin/carboplatin; TP/TC: Paclitaxel-cisplatin/carboplatin; DP: Docetaxel-carboplatin; Patient 1 and 13 had EGFR 20ins, Patient 2 had a SNV of p.D770E in exon 20. They tried immunotherapy as first line treatment and has no history of target therapy before immunotherapy.

**Table S3** Univariable analysis of progression-free survival (PFS) and progression-free survival post oligoprogression (PFS-PO)

|                          | PFS                   |         | PFS-PO                |         |
|--------------------------|-----------------------|---------|-----------------------|---------|
|                          | Hazard Ratio (95% CI) | P value | Hazard Ratio (95% CI) | P value |
| Age: ≥65                 | 0.81 [0.35, 1.85]     | 0.614   | 2.91 [0.94, 9.03]     | 0.064   |
| Gender: Male             | 0.62 [0.25, 1.53]     | 0.296   | 1.36 [0.46, 4.00]     | 0.572   |
| Pathology: Squamous      | 2.47 [1.02, 5.99]     | 0.046   | 2.30 [0.86, 6.16]     | 0.099   |
| Stage: IVA               | 1.18 [0.31, 4.52]     | 0.807   | 0.56 [0.08, 4.08]     | 0.563   |
| Stage: IVB               | 1.21 [0.39, 3.73]     | 0.743   | 1.31 [0.28, 6.11]     | 0.729   |
| ECOG: ≥2                 | 1.93 [0.78, 4.76]     | 0.152   | 1.21 [0.44, 3.37]     | 0.711   |
| Smoking: Always          | 0.67 [0.27, 1.64]     | 0.375   | 3.46 [1.00, 12.01]    | 0.051   |
| Smoking: Former          | 0.64 [0.13, 3.04]     | 0.571   | 2.12 [0.24, 19.01]    | 0.501   |
| LIPI: ≥1                 | 2.53 [1.00, 6.42]     | 0.050   | 2.47 [0.90, 6.73]     | 0.078   |
| PD-L1: Positive          | 0.49 [0.20, 1.17]     | 0.108   | 0.43 [0.16, 1.19]     | 0.104   |
| EGFR: Mutant             | 1.74 [0.48, 6.31]     | 0.397   | 4.15 [1.06, 15.25]    | 0.041   |
| KRAS: Mutant             | 0.32 [0.09, 1.16]     | 0.082   | 0.56 [0.12, 2.60]     | 0.457   |
| TP53: Mutant             | 0.79 [0.24, 2.56]     | 0.696   | 1.75 [0.48, 6.34]     | 0.393   |
| Lines of CPI therapy: ≥2 | 1.07 [0.43, 2.62]     | 0.89    | 1.36 [0.51, 3.67]     | 0.542   |
| CPI Strategy: Mono       | 2.89 [0.92, 9.07]     | 0.068   | 0.87 [0.25, 3.10]     | 0.834   |
| CPI Strategy-PO: Mono    | -                     | -       | 1.13 [0.39, 3.27]     | 0.823   |
| Strategy Modified        | -                     | -       | 0.99 [0.34, 2.87]     | 0.979   |

ECOG, performance score of Eastern Cooperative Oncology Group; LIPI, the lung immune prognostic index; CPI, checkpoint inhibitor; CPI Strategy-PO, strategy of checkpoint inhibitor post oligoprogression.

**Table S4** Univariable analysis of overall survival (OS) and overall survival post oligoprogression (OS-PO)

|                          | OS                    |         | OS-PO                 |         |
|--------------------------|-----------------------|---------|-----------------------|---------|
|                          | Hazard Ratio (95% CI) | P value | Hazard Ratio (95% CI) | P value |
| Age: ≥65                 | 0.66 [0.13, 3.41]     | 0.619   | 1.57 [0.26, 9.61]     | 0.624   |
| Gender: Male             | 0.56 [0.14, 2.32]     | 0.426   | 0.87 [0.21, 3.61]     | 0.843   |
| Pathology: Squamous      | 7.57 [1.52, 37.81]    | 0.014   | 6.76 [1.36, 33.68]    | 0.02    |
| Stage: IVA               | 0.52 [0.03, 8.47]     | 0.643   | 0.11 [0.00, 3.08]     | 0.196   |
| Stage: IVB               | 1.28 [0.15, 10.95]    | 0.820   | 0.23 [0.01, 3.80]     | 0.306   |
| ECOG: ≥2                 | 2.04 [0.51, 8.21]     | 0.315   | 1.71 [0.43, 6.86]     | 0.450   |
| Smoking: Always          | 0.70 [0.13, 3.82]     | 0.676   | 2.25 [0.33, 15.26]    | 0.405   |
| Smoking: Former          | 1.70 [0.19, 15.39]    | 0.635   | 6.05 [0.43, 85.18]    | 0.182   |
| LIPI: ≥1                 | 4.88 [1.83, 43.16]    | 0.061   | 12.68 [1.44, 111.60]  | 0.022   |
| PD-L1: Positive          | 0.08 [0.01, 0.68]     | 0.020   | 0.11 [0.01, 0.91]     | 0.041   |
| EGFR: Mutant             | 2.00 [0.20, 19.57]    | 0.553   | 2.07 [0.20, 21.08]    | 0.539   |
| KRAS: Mutant             | 1.27 [0.11, 14.12]    | 0.844   | 1.10 [0.10, 12.27]    | 0.936   |
| TP53: Mutant             | 5.81 [0.52, 64.44]    | 0.152   | 4.03 [0.36, 44.95]    | 0.258   |
| Lines of ICI therapy: ≥2 | 1.46 [0.35, 5.99]     | 0.601   | 0.90 [0.22, 3.76]     | 0.884   |
| CPI Strategy: Mono       | 0.56 [0.07, 4.64]     | 0.593   | 0.37 [0.04, 3.08]     | 0.359   |
| CPI Strategy-PO: Mono    | -                     | -       | 0.52 [0.10, 2.73]     | 0.442   |
| Strategy Modified        | -                     | -       | 1.38 [0.33, 5.84]     | 0.663   |

ECOG, performance score of Eastern Cooperative Oncology Group; LIPI, the lung immune prognostic index; CPI, checkpoint inhibitor; CPI Strategy-PO, strategy of checkpoint inhibitor post oligoprogression.
